# Supplementary material
Source: Elsevier journal article supplement (https://www.sciencedirect.com/science/article/pii/S0300893219304737)
Supplement: mmc1 [file mmc1.pdf]

**SUPPLEMENTARY DATA**

**Table 1**

Multivariable logistic regression model performed to create the propensity score

|                                            | OR (95%CI)       | P    |
|--------------------------------------------|------------------|------|
| Age, y                                     | 0.98 (0.95-1.01) | .135 |
| Male sex                                   | 0.83 (0.36-1.90) | .659 |
| Health care-associated IE                  | 0.59 (0.27-1.28) | .179 |
| Prosthetic valve IE                        | 2.02 (0.74-5.49) | .168 |
| Previous IE                                | 0.40 (0.10-1.64) | .203 |
| COPD                                       | 2.52 (1.05-6.00) | .038 |
| Diabetes mellitus                          | 1.38 (0.59-3.21) | .461 |
| Cancer                                     | 2.97 (0.90-9.83) | .074 |
| Charlson index                             | 0.79 (0.67-0.92) | .003 |
| Leukocyte count                            | 1.00 (0.99-1.00) | .435 |
| Hemoglobin                                 | 0.92 (0.77-1.09) | .326 |
| Platelet count                             | 1.00 (1.00-1.00) | .009 |
| EGFR                                       | 0.99 (0.98-1.01) | .874 |
| Vegetation present                         | 0.85 (0.30-2.41) | .766 |
| New moderate or severe valve regurgitation | 1.11 (0.35-3.52) | .863 |
| Abscess                                    | 1.17 (0.52-2.66) | .706 |
| LVEF                                       | 1.02 (0.99-1.05) | .175 |
| <i>Staphylococcus aureus</i>               | 0.80 (0.38-1.71) | .572 |
| Heart failure                              | 2.73 (1.27-5.88) | .010 |
| AV block                                   | 2.12 (0.69-6.53) | .189 |
| Shock                                      | 0.66 (0.28-1.53) | .332 |
| Embolization                               | 1.42 (0.61-3.32) | .413 |
| Stroke                                     | 0.34 (0.14-0.83) | .018 |
| EuroSCORE                                  | 0.97 (0.95-0.99) | .005 |

AV, atrioventricular; COPD, chronic obstructive pulmonary disease; EGFR, estimated glomerular filtration rate; IE, infective endocarditis; LVEF, left ventricular ejection fraction.

**Table 2**

## Indications for cardiac surgery

|                               | Overall<br>(n = 271) | Unmatched cohort     |                        |          | Matched cohort (n = 132) |                        |          |
|-------------------------------|----------------------|----------------------|------------------------|----------|--------------------------|------------------------|----------|
|                               |                      | Surgery<br>(n = 188) | SINUS-LSIE<br>(n = 83) | <i>P</i> | Surgery<br>(n = 66)      | SINUS-LSIE<br>(n = 66) | <i>P</i> |
| Severe valvular regurgitation | 130 (48.0)           | 93 (49.5)            | 37 (44.6)              | .458     | 21 (31.8)                | 29 (43.9)              | .151     |
| Local complication            | 73 (27.0)            | 48 (25.5)            | 25 (30.1)              | .433     | 21 (31.8)                | 19 (28.8)              | .705     |
| Heart failure                 | 38 (14.0)            | 32 (17.0)            | 6 (7.2)                | .032     | 16 (24.2)                | 6 (9.1)                | .020     |
| Embolic event                 | 11 (4.1)             | 4 (2.1)              | 7 (8.4)                | .015     | 3 (4.6)                  | 5 (7.6)                | .466     |
| Vegetation size               | 4 (1.5)              | 2 (1.1)              | 2 (2.4)                | .397     | 2 (3.0)                  | 2 (3.0)                | 1.000    |
| Early prosthetic valve IE     | 4 (1.5)              | 3 (1.6)              | 1 (1.2)                | .806     | 2 (3.0)                  | 1 (1.5)                | .559     |
| Multiresistant organism       | 3 (1.1)              | 2 (1.1)              | 1 (1.2)                | .919     | 1 (1.5)                  | 1 (1.5)                | 1.000    |
| Persistent bacteremia         | 2 (0.7)              | 0                    | 2 (2.4)                | .033     | 0                        | 2 (3.0)                | .154     |

IE, infective endocarditis; SINUS-LSIE, surgery-indicated not undergoing surgery patients with left-sided infective endocarditis.

Unless otherwise indicated, the data are presented as No. (%).

**Table 3**

Univariable and multivariable Cox regression analyses for 61-day to 3-year mortality

|                                            | Univariable Analysis |        | Multivariable Analysis |        |
|--------------------------------------------|----------------------|--------|------------------------|--------|
|                                            | HR (95% CI)          | P      | HR (95%CI)             | P      |
| Age, y                                     | 1.04 (1.01-1.07)     | .015   |                        |        |
| Male sex                                   | 0.51 (0.25-1.03)     | .062   |                        |        |
| Health care-associated IE                  | 1.27 (0.61-2.73)     | .528   |                        |        |
| Prosthetic valve IE                        | 1.29 (0.63-2.65)     | .478   |                        |        |
| Unknown etiology                           | 1.00 (0.30-3.27)     | .994   |                        |        |
| SINUS-LSIE                                 | 3.19 (1.53-6.62)     | .002   | 1.89 (0.68-5.19)       | .220   |
| Previous IE                                | 4.07 (1.56-10.62)    | .004   | 15.54 (4.44-54.4)      | < .001 |
| Coronary artery disease                    | 2.45 (1.12-5.36)     | .024   |                        |        |
| COPD                                       | 0.82 (0.36-1.90)     | .648   |                        |        |
| Diabetes mellitus                          | 3.66 (1.81-7.38)     | < .001 | 3.17 (1.13-8.90)       | .028   |
| Cancer                                     | 1.19 (0.42-3.38)     | .750   |                        |        |
| HIV                                        | 3.10 (0.74-13.0)     | .121   |                        |        |
| Charlson index                             | 1.28 (1.16-1.42)     | < .001 | 1.27 (1.07-1.51)       | .007   |
| Leukocyte count                            | 1.00 (1.00-1.01)     | .889   |                        |        |
| Hemoglobin                                 | 0.79 (0.65-0.97)     | .025   |                        |        |
| Platelet count                             | 0.99 (0.99-1.00)     | .820   |                        |        |
| EGFR                                       | 0.98 (0.97-0.99)     | .005   |                        |        |
| Vegetation present                         | 0.72 (0.31-1.67)     | .447   |                        |        |
| New moderate or severe valve regurgitation | 0.70 (0.35-1.41)     | .321   |                        |        |
| Heart failure                              | 1.15 (0.57-2.32)     | .705   |                        |        |
| Atrioventricular block                     | 0.92 (0.28-3.01)     | .885   |                        |        |
| Shock                                      | 2.48 (1.15-5.36)     | .021   |                        |        |
| Embolization                               | 1.69 (0.81-3.50)     | .161   |                        |        |
| Stroke                                     | 1.61 (0.75-3.48)     | .225   |                        |        |
| <i>Staphylococcus aureus</i>               | 0.59 (0.25-1.37)     | .222   |                        |        |

|                     |                  |      |  |  |
|---------------------|------------------|------|--|--|
| <i>Enterococcus</i> | 2.44 (1.17-5.05) | .017 |  |  |
| EuroSCORE           | 1.02 (1.00-1.04) | .011 |  |  |

CI, confidence interval; COPD, chronic obstructive pulmonary disease; EGFR, estimated glomerular filtration rate; HIV, human immunodeficiency virus; HR, hazard ratio; IE, infective endocarditis; SINUS-LSIE, surgery-indicated not undergoing surgery patients with left-sided infective endocarditis.

**Table 4**

Baseline demographic, clinical, and microbiological characteristics of the study participants included in the long-term analysis

|                                            | Overall<br>(n = 178) | Surgery<br>(n = 148) | SINUS-LSIE<br>(n = 30) | <i>P</i> |
|--------------------------------------------|----------------------|----------------------|------------------------|----------|
| <i>Age, y</i>                              | 62.6 ± 13.8          | 61.5 ± 13.1          | 68.0 ± 13.8            | .017     |
| <i>Male sex</i>                            | 134 (75.3)           | 113 (76.4)           | 21 (70.0)              | .462     |
| <i>Health care-associated IE</i>           | 57 (32.0)            | 43 (29.1)            | 14 (46.7)              | .059     |
| <i>Prosthetic valve IE</i>                 | 58 (32.6)            | 45 (30.4)            | 13 (43.3)              | .168     |
| <i>Clinical history</i>                    |                      |                      |                        |          |
| Previous IE                                | 10 (5.7)             | 7 (4.7)              | 3 (10.3)               | .231     |
| Coronary artery disease                    | 34 (21.5)            | 26 (19.9)            | 8 (29.6)               | .260     |
| COPD                                       | 43 (24.2)            | 35 (23.7)            | 8 (26.7)               | .725     |
| Diabetes mellitus                          | 52 (29.4)            | 43 (29.3)            | 9 (30.0)               | .935     |
| Cancer                                     | 18 (10.1)            | 16 (10.8)            | 2 (6.7)                | .492     |
| HIV                                        | 4 (2.3)              | 3 (2.0)              | 1 (3.3)                | .660     |
| Charlson Index, median (IQR)               | 2 (1-4)              | 2 (1-4)              | 3 (2-6)                | .006     |
| <i>Laboratory tests</i>                    |                      |                      |                        |          |
| Leukocyte count, x 10 <sup>9</sup> /L      | 11.1 ± 5.0           | 11.3 ± 4.9           | 9.9 ± 5.2              | .176     |
| Hemoglobin, g/dL                           | 10.6 ± 1.8           | 10.6 ± 1.9           | 10.5 ± 1.8             | .680     |
| Platelet count, x 10 <sup>9</sup> /L       | 224 ± 106            | 229 ± 107            | 203 ± 106              | .241     |
| CRP, mg/L                                  | 77 [33-127]          | 81 [32-123]          | 72 [41-128]            | .926     |
| EGFR, mL/min/1.73m <sup>2</sup>            | 63.9 ± 31.5          | 63.9 ± 30.0          | 63.9 ± 38.3            | .999     |
| <i>Echocardiography</i>                    |                      |                      |                        |          |
| Vegetation present                         | 146 (82.5)           | 121 (82.3)           | 25 (83.3)              | .893     |
| New moderate or severe valve regurgitation | 154 (89.0)           | 128 (89.5)           | 26 (86.7)              | .651     |
| Perforation                                | 45 (25.3)            | 40 (27.0)            | 5 (16.7)               | .234     |
| Abscess                                    | 62 (34.8)            | 50 (33.8)            | 12 (40.0)              | .515     |
| Fistula                                    | 1 (0.6)              | 1 (0.7)              | 0                      | 1.000    |
| Dehiscence                                 | 5 (2.8)              | 4 (2.7)              | 1 (3.3)                | 1.000    |
| LVEF, %                                    | 60.9 ± 11.1          | 61.6 ± 10.7          | 57.8 ± 12.5            | .109     |
| <i>Microbiology</i>                        |                      |                      |                        |          |
| <i>Staphylococcus aureus</i>               | 56 (31.5)            | 47 (31.8)            | 9 (30.0)               | .850     |
| <i>Streptococcus</i> species               | 56 (31.5)            | 49 (33.1)            | 7 (23.3)               | .293     |
| <i>Enterococcus</i> species                | 35 (19.7)            | 24 (16.2)            | 11 (36.7)              | .010     |
| Gram-negative                              | 4 (2.3)              | 4 (2.7)              | 0                      | 1.000    |
| Fungal                                     | 3 (1.7)              | 2 (1.4)              | 1 (3.3)                | .427     |

|                        |           |            |            |      |
|------------------------|-----------|------------|------------|------|
| Unknown                | 16 (9.0)  | 16 (10.8)  | 0 (0)      | .078 |
| <i>Complications</i>   |           |            |            |      |
| Heart failure          | 93 (55.7) | 81 (58.7)  | 12 (41.4)  | .088 |
| Atrioventricular block | 18 (10.8) | 17 (12.3)  | 1 (3.5)    | .205 |
| Shock                  | 26 (15.6) | 24 (17.4)  | 2 (6.9)    | .156 |
| Stroke                 | 37 (20.8) | 28 (18.9)  | 9 (30.0)   | .173 |
| Embolization           | 95 (56.6) | 76 (54.7)  | 19 (65.5)  | .248 |
| <i>EuroSCORE, %</i>    | 14 [7-29] | 12 [7-285] | 28 [14-46] | .001 |

COPD, chronic obstructive pulmonary disease; CRP, C reactive protein; EGFR, estimated glomerular filtration rate; HIV, human immunodeficiency virus; IE, infective endocarditis; LVEF, left ventricular ejection fraction; SINUS-LSIE, surgery-indicated not undergoing surgery patients with left-sided infective endocarditis.

Unless otherwise indicated, the data are presented as No. (%), mean  $\pm$  1 standard deviation, or median [interquartile range].

**Table 5**Clinical characteristics of SINUS-LSIE patients with *Staphylococcus aureus* infection

|                                            | Non- <i>S. aureus</i> (n=47) | <i>S. aureus</i> (n = 36) | <i>P</i> |
|--------------------------------------------|------------------------------|---------------------------|----------|
| <i>Age, y</i>                              | 66.7 ± 16.7                  | 70.6 ± 11.9               | .237     |
| <i>Male sex</i>                            | 35 (74.5)                    | 25 (69.4)                 | .612     |
| <i>Healthcare-associated IE</i>            | 17 (36.2)                    | 25 (69.4)                 | .003     |
| <i>Prosthetic valve IE</i>                 | 16 (34.0)                    | 17 (47.2)                 | .224     |
| <i>Laboratory tests</i>                    |                              |                           |          |
| Leukocytes, x 10 <sup>9</sup> /L           | 13.2 ± 8.3                   | 11.5 ± 5.1                | .291     |
| Hemoglobin, g/dL                           | 10.4±1.8                     | 10.5±3.7                  | .903     |
| EGFR, mL/min/1.73m <sup>2</sup>            | 57.1 ± 31.7                  | 45.0 ± 34.6               | .105     |
| <i>Echocardiography</i>                    |                              |                           |          |
| Vegetation present                         | 42 (89.4)                    | 27 (77.1)                 | .134     |
| New moderate or severe valve regurgitation | 26 (57.8)                    | 22 (61.1)                 | .762     |
| Perforation                                | 9 (19.2)                     | 5 (13.9)                  | .526     |
| Abscess                                    | 14 (29.8)                    | 15 (41.7)                 | .261     |
| Dehiscence                                 | 2 (4.3)                      | 1 (2.8)                   | .721     |
| <i>Complications</i>                       |                              |                           |          |
| Heart failure                              | 24 (53.3)                    | 20 (55.6)                 | .842     |
| AV block                                   | 3 (6.7)                      | 5 (13.9)                  | .279     |
| Shock                                      | 11 (24.4)                    | 12 (33.3)                 | .378     |
| Stroke                                     | 19 (40.4)                    | 12 (33.3)                 | .508     |
| Embolization                               | 32 (71.1)                    | 23 (63.9)                 | .489     |
| <i>EuroSCORE</i>                           | 34 (15-51)                   | 35 (17-55)                | .541     |
| <i>Outcome</i>                             |                              |                           |          |
| 0- to 60-day mortality                     | 26 (55.3)                    | 27 (75.0)                 | .064     |

AV, atrioventricular; EGFR, estimated glomerular filtration rate; IE, infective endocarditis;

SINUS-LSIE, surgery-indicated not undergoing surgery patients with left-sided infective endocarditis.

Data are presented as No. (%) and mean ± 1 SD.
